# Supplementary material
Source: PubMed Central journal article supplement (PMC1681478)
Supplement: msb4100046-s1.pdf [file msb4100046-s1.pdf]

## Nucleotide Metabolism

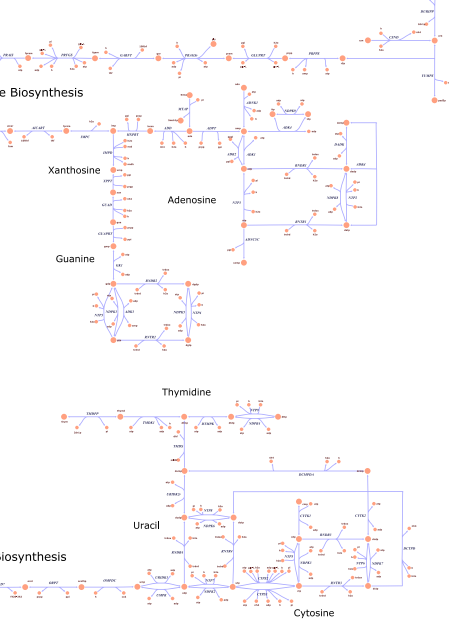

## Methanogenesis

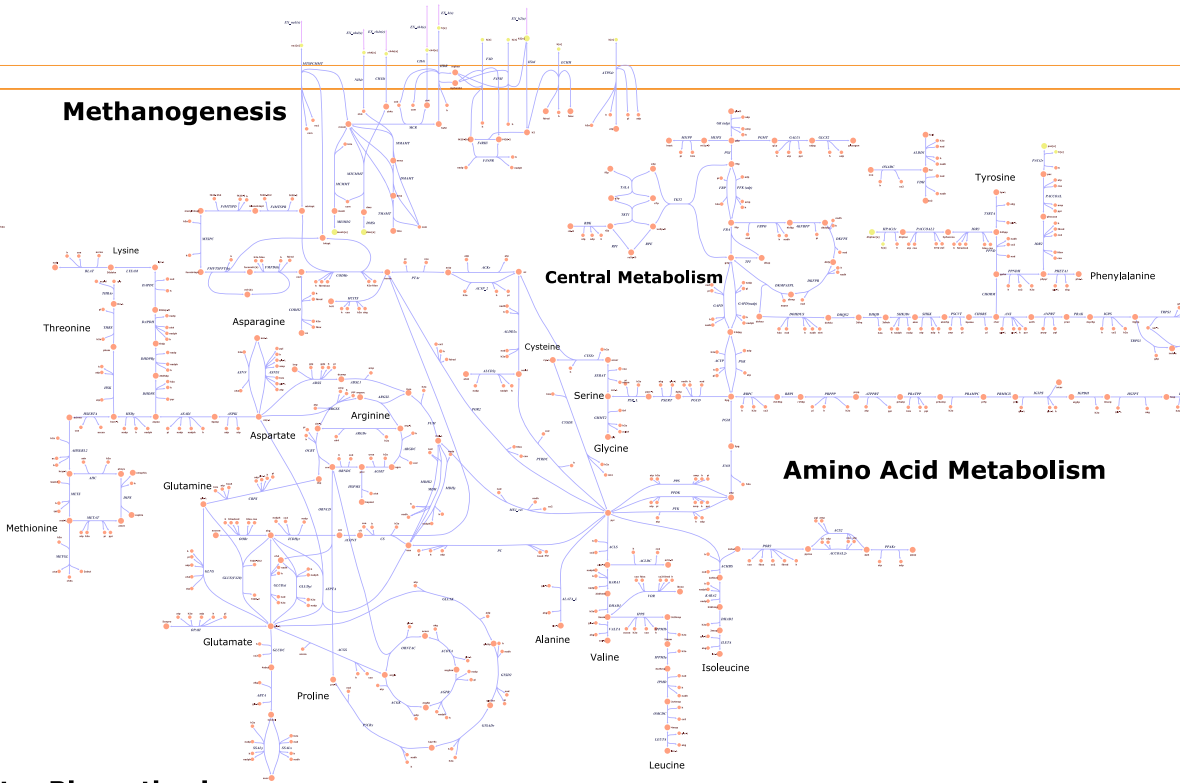

## Central Metabolism

## Amino Acid Metabolism

## Vitamin and Cofactor Biosynthesis

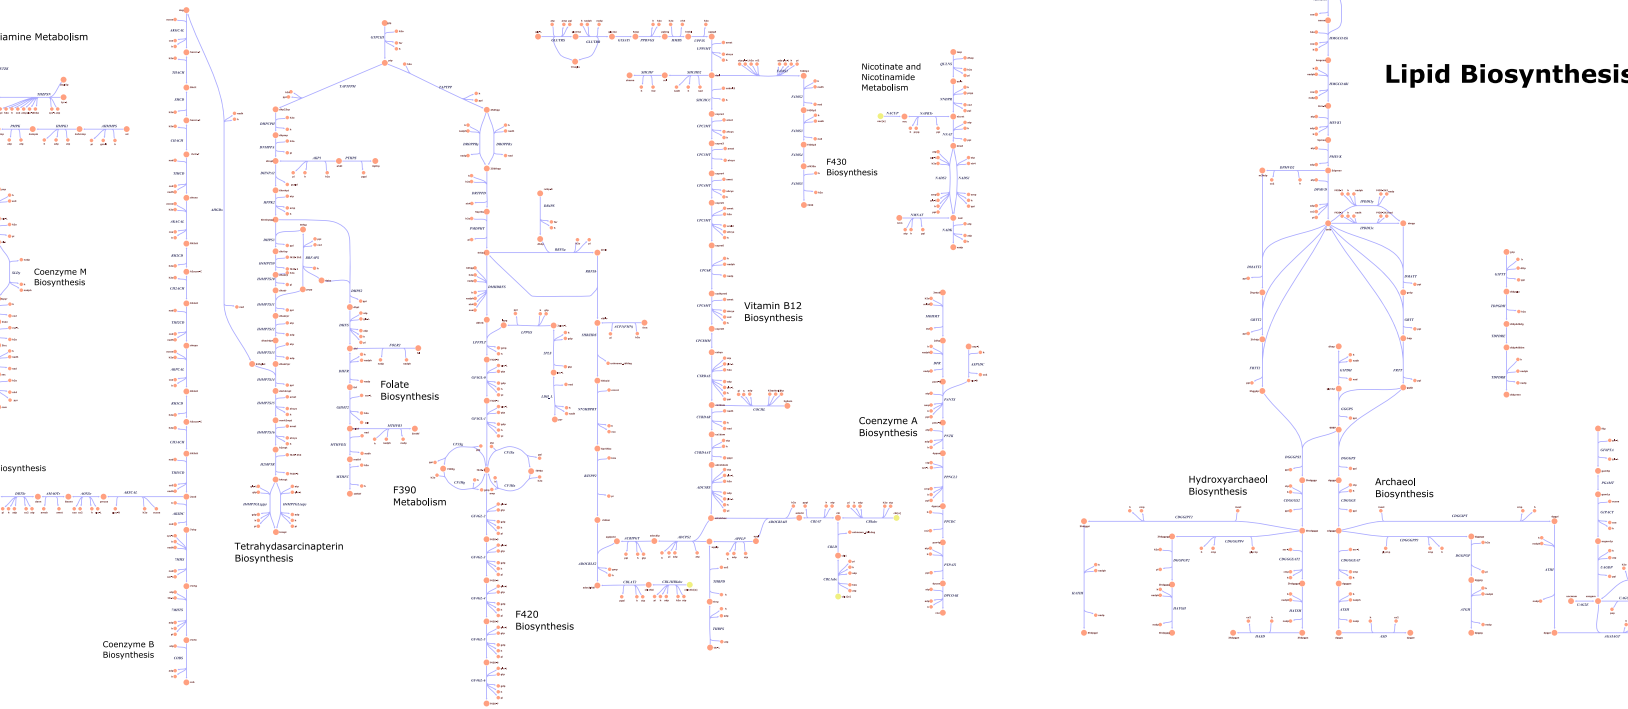

## Lipid Biosynthesis
