# Supplementary material
Source: PubMed Central journal article supplement (PMC1681478)
Supplement: msb4100046-s3.pdf [file msb4100046-s3.pdf]

**Region of Experimentally Observed Growth Yields**

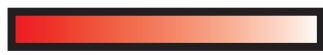

**High Yield**                      **Low Yield**

**Growth Yield Range for Each Substrate in gDW mol<sup>-1</sup> CH<sub>4</sub>**

**Methanol: 7 - 5**

**Acetate: 4 - 2**

**H<sub>2</sub> / CO<sub>2</sub>: 9 - 6**

**Pyruvate: 15 - 12**

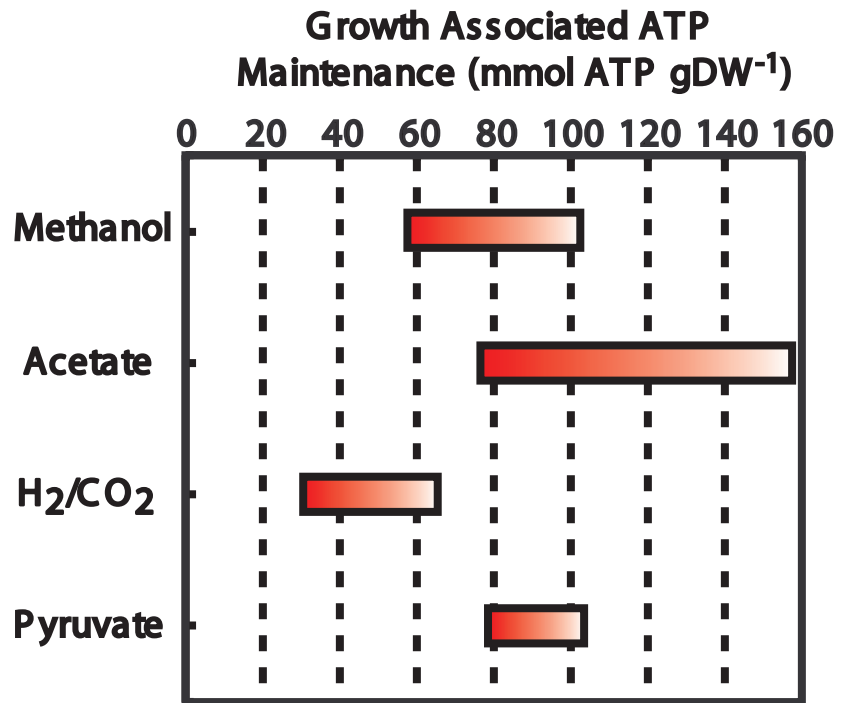

**2.0 protons translocated/2e<sup>-</sup>**
