# Supplementary material
Source: PubMed Central journal article supplement (PMC1681478)

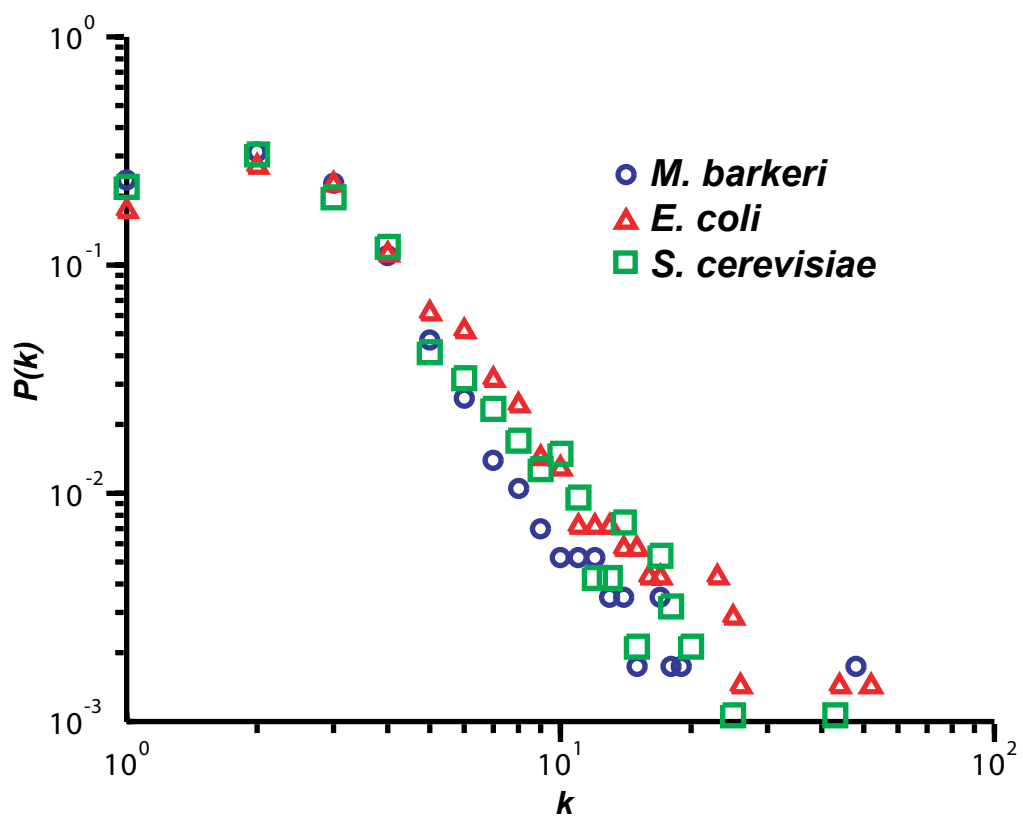

Supplement: msb4100046-s2.pdf [file msb4100046-s2.pdf]
